# Supplementary material for: Involvement of integrin αvβ3 in thyroid hormone-induced dendritogenesis
Source: PubMed Central journal article supplement (PMC9441609; doi:10.3389/fendo.2022.938596), 2022-08-22
Supplement: Image_1.pdf [file Image_1.pdf]

## Supplementary Figure 1.

Table 1. siRNA target sequences.

| Gene                       | Sense                     | Antisense                   |
|----------------------------|---------------------------|-----------------------------|
| DsiRNA Controls            | CGUUAUUCGCGUAUAAUACGCGUAT | AUACGCGUAUUAUACGCGAUUAACGAC |
| Integrin $\alpha$ (Mouse)  | ACAGUUGACUUCAUAAGC        | UUCAGUAGCUUAUGAAGU          |
| Integrin $\beta$ 3 (Mouse) | CUAGGCAAGAACAUAUACC       | AUCAGUUGGUAUUGUUCU          |
| TR $\alpha$ (Mouse)        | GCAUCCUGGAUGGAAUUC        | UUCACUUCAAUCCAUC            |
| TR $\beta$ (Mouse)         | GGCAUCAGGUCCUAAAAU        | UAAGCUUAUUUUAGGACC          |

Table 2. Primer sequences.

| Gene                 | Sense                 | Antisense             |
|----------------------|-----------------------|-----------------------|
| <i>Itgav</i> (Mouse) | TGTGAAGGCGCAGAATCAAG  | AATGCACAGGACAGTCTTGC  |
| <i>Itgb3</i> (Mouse) | GGCAAAAACGCCGTGAATTG  | TTCCACCACATAGAGGACTGC |
| <i>Thra</i> (Mouse)  | CGCTTCAAGAAGTGCATTGC  | TCAATCAGCTTGCGTTTGGC  |
| <i>Thrb</i> (Mouse)  | ACAAGCACCCATCGTGAATG  | TGGCAGCTCACAAAACATGG  |
| <i>Dio1</i> (Mouse)  | GCTGGCAGAGACTGGAAGAC  | CCTGCTGCCTTGAATGAAAT  |
| <i>Dio2</i> (Mouse)  | TGTGTCTGGAACAGCTTCCTC | ACGTGCACCACACTGGAAT   |
| <i>Dio3</i> (Mouse)  | TCAGACGACAACCGTCTGTG  | AAAATTGAGCACCAACGGGC  |
| <i>Gapdh</i> (Mouse) | TGCGACTTCAACAGCAACTC  | ATGTAGGCCATGAGGTCCAC  |
